# Supplementary material
Source: HighWire-hosted journal article supplement (https://bjsm.bmj.com/content/56/17/961)
Supplement: inline-supplementary-material-3 [file inline-supplementary-material-3.pdf]

1

2 Table 5. Full results of logistic regression analysis on having felt disrespected or their judgment  
3 questioned (both genders combined)

| Male athletes      |                    | Odds Ratio | 95% CI       | p value      |
|--------------------|--------------------|------------|--------------|--------------|
| Gender             |                    |            |              |              |
|                    | Male               | Base       |              |              |
|                    | Female             | 1.23       | [0.91,1.65]  | 0.174        |
| Age                |                    | 0.99       | [0.98,1.00]  | 0.221        |
| Region             |                    |            |              |              |
|                    | Europe             | Base       |              |              |
|                    | Africa             | 1.50       | [0.69,3.24]  | 0.305        |
|                    | Asia               | 0.56       | [0.38,0.81]  | <b>0.002</b> |
|                    | North America      | 1.67       | [1.14,2.43]  | <b>0.008</b> |
|                    | Oceania            | 3.33       | [0.37,29.75] | 0.283        |
|                    | South America      | 1.19       | [0.57,2.48]  | 0.653        |
|                    | Multiple           | 0.40       | [0.03,4.56]  | 0.458        |
| Residency training |                    |            |              |              |
|                    | Family Medicine    | Base       |              |              |
|                    | Orthopedics        | 0.70       | [0.46,1.08]  | 0.106        |
|                    | Internal Medicine  | 0.53       | [0.29,0.96]  | <b>0.037</b> |
|                    | PM&R               | 0.74       | [0.47,1.18]  | 0.203        |
|                    | Pediatrics         | 0.67       | [0.34,1.31]  | 0.243        |
|                    | Emergency Medicine | 0.45       | [0.22,0.90]  | 0.024        |
|                    | Sports Medicine    | 1.22       | [0.64,2.33]  | 0.537        |
|                    | Other              | 0.78       | [0.39,1.56]  | 0.479        |
| Female athletes    |                    | Odds Ratio | 95% CI       | p value      |
| Gender             |                    |            |              |              |
|                    | Male               | Base       |              |              |
|                    | Female             | 0.83       | [0.62,1.11]  | 0.205        |
| Age                |                    | 0.99       | [0.98,1.01]  | 0.314        |
| Region             |                    |            |              |              |
|                    | Europe             | Base       |              |              |
|                    | Africa             | 1.83       | [0.86,3.90]  | 0.119        |
|                    | Asia               | 0.57       | [0.39,0.85]  | <b>0.006</b> |
|                    | North America      | 1.48       | [1.02,2.15]  | <b>0.039</b> |
|                    | Oceania            | 1.33       | [0.27,6.54]  | 0.722        |
|                    | South America      | 0.82       | [0.39,1.75]  | 0.610        |
|                    | Multiple           | 0.58       | [0.05,6.63]  | 0.659        |
| Residency training |                    |            |              |              |
|                    | Family Medicine    | Base       |              |              |
|                    | Orthopedics        | 0.58       | [0.38,0.90]  | <b>0.014</b> |
|                    | Internal Medicine  | 0.99       | [0.55,1.79]  | 0.975        |
|                    | PM&R               | 0.85       | [0.54,1.33]  | 0.466        |
|                    | Pediatrics         | 0.94       | [0.49,1.79]  | 0.842        |

1

|                    |            |              |                   |
|--------------------|------------|--------------|-------------------|
| Emergency Medicine | 0.66       | [0.33,1.33]  | 0.250             |
| Sports Medicine    | 1.04       | [0.56,1.94]  | 0.903             |
| Other              | 0.56       | [0.27,1.18]  | 0.128             |
| Male coaches       | Odds Ratio | 95% CI       | p value           |
| Gender             |            |              |                   |
| Male               | Base       |              |                   |
| Female             | 2.01       | [1.48,2.74]  | <b>&lt; 0.001</b> |
| Age                | 1.00       | [0.98,1.01]  | 0.483             |
| Region             |            |              |                   |
| Europe             | Base       |              |                   |
| Africa             | 2.42       | [1.01,5.79]  | <b>0.048</b>      |
| Asia               | 0.62       | [0.42,0.90]  | <b>0.013</b>      |
| North America      | 1.45       | [0.99,2.14]  | 0.059             |
| Oceania            | 2.57       | [0.28,23.52] | 0.402             |
| South America      | 0.92       | [0.43,1.94]  | 0.821             |
| Multiple           | 0.38       | [0.03,4.35]  | 0.434             |
| Residency training |            |              |                   |
| Family Medicine    | Base       |              |                   |
| Orthopedics        | 0.67       | [0.43,1.03]  | 0.068             |
| Internal Medicine  | 0.78       | [0.42,1.45]  | 0.441             |
| PM&R               | 0.52       | [0.32,0.83]  | <b>0.007</b>      |
| Pediatrics         | 0.96       | [0.45,2.02]  | 0.913             |
| Emergency Medicine | 0.29       | [0.14,0.60]  | <b>0.001</b>      |
| Sports Medicine    | 1.29       | [0.66,2.53]  | 0.461             |
| Other              | 0.49       | [0.24,1.01]  | 0.052             |
| Female coaches     | Odds Ratio | 95% CI       | p value           |
| Gender             |            |              |                   |
| Male               | Base       |              |                   |
| Female             | 1.03       | [0.76,1.38]  | 0.858             |
| Age                | 1.01       | [0.99,1.02]  | 0.320             |
| Region             |            |              |                   |
| Europe             | Base       |              |                   |
| Africa             | 6.24       | [2.63,14.84] | <b>&lt; 0.001</b> |
| Asia               | 1.03       | [0.68,1.55]  | 0.904             |
| North America      | 1.61       | [1.09,2.36]  | <b>0.017</b>      |
| Oceania            | 1.67       | [0.34,8.25]  | 0.526             |
| South America      | 1.30       | [0.60,2.81]  | 0.498             |
| Multiple           | 0.88       | [0.08,10.19] | 0.918             |
| Residency training |            |              |                   |
| Family Medicine    | Base       |              |                   |
| Orthopedics        | 0.47       | [0.30,0.74]  | <b>0.001</b>      |
| Internal Medicine  | 0.73       | [0.40,1.34]  | 0.316             |
| PM&R               | 0.74       | [0.46,1.17]  | 0.199             |
| Pediatrics         | 0.66       | [0.34,1.27]  | 0.214             |
| Emergency Medicine | 0.36       | [0.16,0.82]  | <b>0.014</b>      |

|                                              |            |              |                   |
|----------------------------------------------|------------|--------------|-------------------|
| Sports Medicine                              | 1.22       | [0.64,2.32]  | 0.540             |
| Other                                        | 0.60       | [0.29,1.24]  | 0.166             |
| Male physicians in practice longer           | Odds Ratio | 95% CI       | p value           |
| Gender                                       |            |              |                   |
| Male                                         | Base       |              |                   |
| Female                                       | 2.18       | [1.58,3.01]  | <b>&lt; 0.001</b> |
| Age                                          | 0.97       | [0.95,0.98]  | <b>&lt; 0.001</b> |
| Region                                       |            |              |                   |
| Europe                                       | Base       |              |                   |
| Africa                                       | 3.96       | [1.51,10.39] | <b>0.005</b>      |
| Asia                                         | 1.04       | [0.71,1.55]  | 0.830             |
| North America                                | 2.29       | [1.48,3.52]  | <b>&lt; 0.001</b> |
| Oceania                                      | 0.06       | [0.01,0.59]  | <b>0.016</b>      |
| South America                                | 2.15       | [0.97,4.78]  | 0.060             |
| Multiple                                     | 0.51       | [0.04,6.42]  | 0.605             |
| Residency training                           |            |              |                   |
| Family Medicine                              | Base       |              |                   |
| Orthopedics                                  | 1.49       | [0.92,2.39]  | 0.102             |
| Internal Medicine                            | 0.85       | [0.44,1.66]  | 0.632             |
| PM&R                                         | 0.85       | [0.51,1.42]  | 0.530             |
| Pediatrics                                   | 1.70       | [0.70,4.11]  | 0.238             |
| Emergency Medicine                           | 1.02       | [0.46,2.26]  | 0.968             |
| Sports Medicine                              | 2.15       | [1.04,4.41]  | <b>0.038</b>      |
| Other                                        | 1.61       | [0.78,3.31]  | 0.197             |
| Male physicians in practice the same or less | Odds Ratio | 95% CI       | p value           |
| Gender                                       |            |              |                   |
| Male                                         | Base       |              |                   |
| Female                                       | 2.10       | [1.58,2.80]  | <b>&lt; 0.001</b> |
| Age                                          | 1.00       | [0.99,1.01]  | 0.916             |
| Region                                       |            |              |                   |
| Europe                                       | Base       |              |                   |
| Africa                                       | 1.96       | [0.90,4.27]  | 0.091             |
| Asia                                         | 0.87       | [0.60,1.27]  | 0.476             |
| North America                                | 1.32       | [0.91,1.93]  | 0.148             |
| Oceania                                      | 1.62       | [0.32,8.15]  | 0.560             |
| South America                                | 0.92       | [0.43,1.96]  | 0.824             |
| Multiple                                     | 0.80       | [0.07,8.94]  | 0.853             |
| Residency training                           |            |              |                   |
| Family Medicine                              | Base       |              |                   |
| Orthopedics                                  | 1.10       | [0.72,1.69]  | 0.663             |
| Internal Medicine                            | 0.62       | [0.34,1.15]  | 0.130             |
| PM&R                                         | 0.73       | [0.46,1.15]  | 0.172             |
| Pediatrics                                   | 1.18       | [0.60,2.29]  | 0.636             |
| Emergency Medicine                           | 1.41       | [0.68,2.92]  | 0.360             |
| Sports Medicine                              | 0.99       | [0.52,1.87]  | 0.973             |

|                                                |            |              |                   |
|------------------------------------------------|------------|--------------|-------------------|
| Other                                          | 1.12       | [0.56,2.24]  | 0.741             |
| Female physicians in practice longer           | Odds Ratio | 95% CI       | p value           |
| Gender                                         |            |              |                   |
| Male                                           | Base       |              |                   |
| Female                                         | 1.10       | [0.82,1.47]  | 0.532             |
| Age                                            | 0.96       | [0.95,0.97]  | <b>&lt; 0.001</b> |
| Region                                         |            |              |                   |
| Europe                                         | Base       |              |                   |
| Africa                                         | 2.64       | [1.19,5.85]  | <b>0.017</b>      |
| Asia                                           | 0.73       | [0.49,1.09]  | 0.125             |
| North America                                  | 1.22       | [0.83,1.80]  | 0.318             |
| Oceania                                        | 0.48       | [0.08,2.80]  | 0.418             |
| South America                                  | 0.57       | [0.24,1.35]  | 0.204             |
| Multiple                                       | 0.85       | [0.07,10.13] | 0.900             |
| Residency training                             |            |              |                   |
| Family Medicine                                | Base       |              |                   |
| Orthopedics                                    | 0.98       | [0.62,1.54]  | 0.928             |
| Internal Medicine                              | 0.91       | [0.49,1.71]  | 0.779             |
| PM&R                                           | 0.99       | [0.63,1.57]  | 0.970             |
| Pediatrics                                     | 0.98       | [0.51,1.90]  | 0.955             |
| Emergency Medicine                             | 0.82       | [0.40,1.70]  | 0.597             |
| Sports Medicine                                | 1.10       | [0.57,2.12]  | 0.777             |
| Other                                          | 1.01       | [0.48,2.14]  | 0.971             |
| Female physicians in practice the same or less | Odds Ratio | 95% CI       | p value           |
| Gender                                         |            |              |                   |
| Male                                           | Base       |              |                   |
| Female                                         | 0.78       | [0.57,1.07]  | 0.130             |
| Age                                            | 0.99       | [0.98,1.00]  | 0.084             |
| Region                                         |            |              |                   |
| Europe                                         | Base       |              |                   |
| Africa                                         | 2.59       | [1.20,5.60]  | <b>0.015</b>      |
| Asia                                           | 0.80       | [0.53,1.23]  | 0.314             |
| North America                                  | 1.25       | [0.83,1.90]  | 0.288             |
| Oceania                                        | n.c.       |              |                   |
| South America                                  | 1.09       | [0.49,2.42]  | 0.841             |
| Multiple                                       | 1.29       | [0.11,14.65] | 0.835             |
| Residency training                             |            |              |                   |
| Family Medicine                                | Base       |              |                   |
| Orthopedics                                    | 1.20       | [0.75,1.93]  | 0.445             |
| Internal Medicine                              | 0.81       | [0.41,1.62]  | 0.554             |
| PM&R                                           | 1.28       | [0.79,2.08]  | 0.311             |
| Pediatrics                                     | 1.40       | [0.71,2.76]  | 0.333             |
| Emergency Medicine                             | 2.02       | [0.97,4.18]  | 0.059             |
| Sports Medicine                                | 1.17       | [0.59,2.34]  | 0.653             |
| Other                                          | 1.27       | [0.59,2.74]  | 0.546             |

| Male athletic trainers        |                    | Odds Ratio | 95% CI      | p value      |
|-------------------------------|--------------------|------------|-------------|--------------|
| Gender                        |                    |            |             |              |
|                               | Male               | Base       |             |              |
|                               | Female             | 1.55       | [1.16,2.07] | <b>0.003</b> |
| Age                           |                    | 1.00       | [0.99,1.01] | 0.613        |
| Region                        |                    |            |             |              |
|                               | Europe             | Base       |             |              |
|                               | Africa             | 3.31       | [1.48,7.41] | <b>0.004</b> |
|                               | Asia               | 0.72       | [0.49,1.07] | 0.101        |
|                               | North America      | 1.21       | [0.82,1.76] | 0.336        |
|                               | Oceania            | 1.20       | [0.24,5.96] | 0.825        |
|                               | South America      | 1.07       | [0.51,2.27] | 0.853        |
|                               | Multiple           | n.c.       |             |              |
| Residency training            |                    |            |             |              |
|                               | Family Medicine    | Base       |             |              |
|                               | Orthopedics        | 0.82       | [0.53,1.27] | 0.384        |
|                               | Internal Medicine  | 0.72       | [0.39,1.34] | 0.302        |
|                               | PM&R               | 0.84       | [0.53,1.32] | 0.450        |
|                               | Pediatrics         | 0.71       | [0.37,1.37] | 0.310        |
|                               | Emergency Medicine | 0.51       | [0.24,1.09] | 0.080        |
|                               | Sports Medicine    | 1.41       | [0.74,2.69] | 0.292        |
|                               | Other              | 0.92       | [0.45,1.88] | 0.819        |
| Female athletic trainers      |                    | Odds Ratio | 95% CI      | p value      |
| Gender                        |                    |            |             |              |
|                               | Male               | Base       |             |              |
|                               | Female             | 1.17       | [0.86,1.59] | 0.312        |
| Age                           |                    | 1.00       | [0.99,1.02] | 0.667        |
| Region                        |                    |            |             |              |
|                               | Europe             | Base       |             |              |
|                               | Africa             | 3.46       | [1.59,7.51] | <b>0.002</b> |
|                               | Asia               | 0.75       | [0.49,1.16] | 0.194        |
|                               | North America      | 1.41       | [0.94,2.12] | 0.097        |
|                               | Oceania            | 0.36       | [0.04,3.21] | 0.358        |
|                               | South America      | 2.17       | [1.02,4.60] | <b>0.044</b> |
|                               | Multiple           | n.c.       |             |              |
| Residency training            |                    |            |             |              |
|                               | Family Medicine    | Base       |             |              |
|                               | Orthopedics        | 0.83       | [0.52,1.33] | 0.432        |
|                               | Internal Medicine  | 0.45       | [0.22,0.94] | <b>0.033</b> |
|                               | PM&R               | 1.01       | [0.63,1.63] | 0.955        |
|                               | Pediatrics         | 0.88       | [0.45,1.73] | 0.713        |
|                               | Emergency Medicine | 0.64       | [0.29,1.43] | 0.279        |
|                               | Sports Medicine    | 1.09       | [0.55,2.16] | 0.798        |
|                               | Other              | 0.88       | [0.40,1.92] | 0.741        |
| Organizations/Administrations |                    | Odds Ratio | 95% CI      | p value      |

|                    |      |              |              |
|--------------------|------|--------------|--------------|
| Gender             |      |              |              |
| Male               | Base |              |              |
| Female             | 1.41 | [1.06,1.88]  | <b>0.019</b> |
| Age                | 1.00 | [0.99,1.01]  | 0.882        |
| Region             |      |              |              |
| Europe             | Base |              |              |
| Africa             | 2.34 | [1.08,5.10]  | <b>0.032</b> |
| Asia               | 0.85 | [0.58,1.24]  | 0.408        |
| North America      | 1.12 | [0.77,1.63]  | 0.553        |
| Oceania            | 3.76 | [0.42,33.67] | 0.236        |
| South America      | 2.12 | [1.00,4.50]  | 0.050        |
| Multiple           | 0.54 | [0.05,6.25]  | 0.623        |
| Residency training |      |              |              |
| Family Medicine    | Base |              |              |
| Orthopedics        | 0.74 | [0.48,1.13]  | 0.161        |
| Internal Medicine  | 0.74 | [0.41,1.33]  | 0.311        |
| PM&R               | 0.56 | [0.35,0.88]  | <b>0.012</b> |
| Pediatrics         | 0.85 | [0.44,1.65]  | 0.635        |
| Emergency Medicine | 0.50 | [0.24,1.04]  | 0.063        |
| Sports Medicine    | 1.64 | [0.86,3.12]  | 0.132        |
| Other              | 0.90 | [0.45,1.79]  | 0.766        |

1 PM&R; physical medicine and rehabilitation, 95 % CI; 95 % confidence interval, n.c; not  
2 calculated  
3  
4

- 1 Table 6. Full results of logistic regression analysis on having felt disrespected or their judgment
- 2 questioned (both genders separately)

| Female sports medicine physicians |            |              |              |
|-----------------------------------|------------|--------------|--------------|
| Male athletes                     | Odds Ratio | 95% CI       | p value      |
| Age                               | 1.02       | [0.99,1.05]  | 0.127        |
| Region                            |            |              |              |
| Europe                            | Base       |              |              |
| Africa                            | 4.21       | [1.06,16.63] | <b>0.040</b> |
| Asia                              | 0.58       | [0.26,1.33]  | 0.201        |
| North America                     | 2.76       | [1.40,5.46]  | <b>0.004</b> |
| Oceania                           | n.c.       |              |              |
| South America                     | 0.26       | [0.03,2.46]  | 0.238        |
| Residency training                |            |              |              |
| Family Medicine                   | Base       |              |              |
| Orthopedics                       | 0.83       | [0.36,1.94]  | 0.666        |
| Internal Medicine                 | 0.48       | [0.16,1.44]  | 0.190        |
| PM&R                              | 0.82       | [0.40,1.69]  | 0.586        |
| Pediatrics                        | 0.59       | [0.24,1.42]  | 0.238        |
| Emergency Medicine                | 0.81       | [0.27,2.43]  | 0.708        |
| Sports Medicine                   | 0.64       | [0.22,1.88]  | 0.417        |
| Other                             | 2.27       | [0.50,10.26] | 0.286        |
| Female athletes                   | Odds Ratio | 95% CI       | p value      |
| Age                               | 1.02       | [0.99,1.04]  | 0.209        |
| Region                            |            |              |              |
| Europe                            | Base       |              |              |
| Africa                            | 2.43       | [0.77,7.69]  | 0.132        |
| Asia                              | 0.83       | [0.36,1.90]  | 0.656        |
| North America                     | 1.67       | [0.86,3.24]  | 0.132        |
| Oceania                           | n.c.       |              |              |
| South America                     | 0.36       | [0.04,3.43]  | 0.373        |
| Residency training                |            |              |              |
| Family Medicine                   | Base       |              |              |
| Orthopedics                       | 0.89       | [0.40,2.02]  | 0.789        |
| Internal Medicine                 | 1.07       | [0.37,3.05]  | 0.903        |
| PM&R                              | 1.03       | [0.53,2.00]  | 0.936        |
| Pediatrics                        | 1.22       | [0.53,2.81]  | 0.634        |
| Emergency Medicine                | 1.97       | [0.68,5.68]  | 0.208        |
| Sports Medicine                   | 0.80       | [0.27,2.38]  | 0.684        |
| Other                             | 0.77       | [0.17,3.55]  | 0.738        |
| Male coaches                      | Odds Ratio | 95% CI       | p value      |

|                                    |            |              |                   |
|------------------------------------|------------|--------------|-------------------|
| Age                                | 1.01       | [0.98,1.03]  | 0.658             |
| Region                             |            |              |                   |
| Europe                             | Base       |              |                   |
| Africa                             | 7.03       | [0.84,58.79] | 0.072             |
| Asia                               | 0.74       | [0.32,1.72]  | 0.490             |
| North America                      | 1.38       | [0.66,2.89]  | 0.396             |
| Oceania                            | n.c.       |              |                   |
| South America                      | 0.13       | [0.01,1.32]  | 0.085             |
| Residency training                 |            |              |                   |
| Family Medicine                    | Base       |              |                   |
| Orthopedics                        | 0.62       | [0.25,1.54]  | 0.304             |
| Internal Medicine                  | 0.60       | [0.19,1.95]  | 0.399             |
| PM&R                               | 0.38       | [0.18,0.80]  | 0.011             |
| Pediatrics                         | 1.05       | [0.35,3.13]  | 0.932             |
| Emergency Medicine                 | 0.37       | [0.12,1.14]  | 0.084             |
| Sports Medicine                    | 0.36       | [0.12,1.11]  | 0.074             |
| Other                              | 0.26       | [0.06,1.17]  | 0.079             |
| Female coaches                     | Odds Ratio | 95% CI       | p value           |
| Age                                | 1.01       | [0.99,1.04]  | 0.369             |
| Region                             |            |              |                   |
| Europe                             | Base       |              |                   |
| Africa                             | 7.48       | [1.86,30.04] | <b>0.005</b>      |
| Asia                               | 1.71       | [0.74,3.94]  | 0.210             |
| North America                      | 1.43       | [0.72,2.85]  | 0.303             |
| Oceania                            | n.c.       |              |                   |
| South America                      | 0.55       | [0.06,5.31]  | 0.607             |
| Residency training                 |            |              |                   |
| Family Medicine                    | Base       |              |                   |
| Orthopedics                        | 0.53       | [0.23,1.24]  | 0.145             |
| Internal Medicine                  | 0.62       | [0.21,1.88]  | 0.403             |
| PM&R                               | 0.90       | [0.45,1.80]  | 0.769             |
| Pediatrics                         | 0.76       | [0.33,1.77]  | 0.529             |
| Emergency Medicine                 | 0.58       | [0.19,1.80]  | 0.347             |
| Sports Medicine                    | 0.59       | [0.18,1.88]  | 0.369             |
| Other                              | 0.96       | [0.22,4.22]  | 0.952             |
| Male physicians in practice longer | Odds Ratio | 95% CI       | p value           |
| Age                                | 0.99       | [0.96,1.02]  | 0.471             |
| Region                             |            |              |                   |
| Europe                             | Base       |              |                   |
| Africa                             | 6.92       | [1.34,35.74] | <b>0.021</b>      |
| Asia                               | 1.37       | [0.53,3.55]  | 0.515             |
| North America                      | 4.55       | [2.02,10.29] | <b>&lt; 0.001</b> |
| Oceania                            | n.c.       |              |                   |

|                                              |            |              |              |
|----------------------------------------------|------------|--------------|--------------|
| South America                                | 0.40       | [0.06,2.79]  | 0.354        |
| Residency training                           |            |              |              |
| Family Medicine                              | Base       |              |              |
| Orthopedics                                  | 4.36       | [1.51,12.58] | <b>0.006</b> |
| Internal Medicine                            | 0.43       | [0.13,1.43]  | 0.170        |
| PM&R                                         | 0.75       | [0.33,1.70]  | 0.488        |
| Pediatrics                                   | 1.07       | [0.35,3.23]  | 0.905        |
| Emergency Medicine                           | 1.10       | [0.31,3.94]  | 0.880        |
| Sports Medicine                              | 1.70       | [0.51,5.63]  | 0.386        |
| Other                                        | 7.52       | [0.83,67.93] | 0.072        |
| Male physicians in practice the same or less | Odds Ratio | 95% CI       | p value      |
| Age                                          | 1.01       | [0.99,1.04]  | 0.258        |
| Region                                       |            |              |              |
| Europe                                       | Base       |              |              |
| Africa                                       | 1.05       | [0.33,3.39]  | 0.930        |
| Asia                                         | 0.87       | [0.38,1.96]  | 0.732        |
| North America                                | 1.41       | [0.72,2.75]  | 0.317        |
| Oceania                                      | n.c.       |              |              |
| South America                                | 0.59       | [0.09,3.96]  | 0.591        |
| Residency training                           |            |              |              |
| Family Medicine                              | Base       |              |              |
| Orthopedics                                  | 0.87       | [0.39,1.95]  | 0.739        |
| Internal Medicine                            | 0.43       | [0.15,1.24]  | 0.117        |
| PM&R                                         | 0.47       | [0.24,0.92]  | 0.027        |
| Pediatrics                                   | 1.26       | [0.52,3.10]  | 0.608        |
| Emergency Medicine                           | 1.56       | [0.47,5.18]  | 0.471        |
| Sports Medicine                              | 0.56       | [0.19,1.65]  | 0.292        |
| Other                                        | 2.80       | [0.53,14.96] | 0.228        |
| Female physicians in practice longer         | Odds Ratio | 95% CI       | p value      |
| Age                                          | 0.97       | [0.95,1.00]  | <b>0.043</b> |
| Region                                       |            |              |              |
| Europe                                       | Base       |              |              |
| Africa                                       | 3.35       | [1.01,11.13] | <b>0.048</b> |
| Asia                                         | 1.52       | [0.68,3.41]  | 0.313        |
| North America                                | 1.52       | [0.78,2.95]  | 0.220        |
| Oceania                                      | n.c.       |              |              |
| South America                                | 0.46       | [0.05,4.43]  | 0.505        |
| Residency training                           |            |              |              |
| Family Medicine                              | Base       |              |              |
| Orthopedics                                  | 1.30       | [0.58,2.93]  | 0.527        |
| Internal Medicine                            | 1.02       | [0.36,2.92]  | 0.967        |
| PM&R                                         | 1.21       | [0.62,2.38]  | 0.573        |
| Pediatrics                                   | 0.96       | [0.42,2.21]  | 0.929        |

|                                                |            |              |              |
|------------------------------------------------|------------|--------------|--------------|
| Emergency Medicine                             | 1.01       | [0.36,2.79]  | 0.990        |
| Sports Medicine                                | 0.82       | [0.27,2.50]  | 0.725        |
| Other                                          | 2.21       | [0.53,9.11]  | 0.275        |
| Female physicians in practice the same or less | Odds Ratio | 95% CI       | p value      |
| Age                                            | 1.00       | [0.97,1.02]  | 0.798        |
| Region                                         |            |              |              |
| Europe                                         | Base       |              |              |
| Africa                                         | 3.65       | [1.07,12.41] | <b>0.039</b> |
| Asia                                           | 1.33       | [0.54,3.26]  | 0.538        |
| North America                                  | 1.74       | [0.79,3.82]  | 0.168        |
| Oceania                                        | n.c.       |              |              |
| South America                                  | 0.96       | [0.10,9.45]  | 0.971        |
| Residency training                             |            |              |              |
| Family Medicine                                | Base       |              |              |
| Orthopedics                                    | 1.98       | [0.82,4.80]  | 0.128        |
| Internal Medicine                              | 0.40       | [0.09,1.90]  | 0.251        |
| PM&R                                           | 1.10       | [0.53,2.32]  | 0.796        |
| Pediatrics                                     | 1.08       | [0.44,2.67]  | 0.866        |
| Emergency Medicine                             | 1.96       | [0.65,5.95]  | 0.232        |
| Sports Medicine                                | 0.96       | [0.25,3.65]  | 0.950        |
| Other                                          | 1.99       | [0.41,9.57]  | 0.391        |
| Male athletic trainers                         | Odds Ratio | 95% CI       | p value      |
| Age                                            | 1.01       | [0.98,1.03]  | 0.648        |
| Region                                         |            |              |              |
| Europe                                         | Base       |              |              |
| Africa                                         | 12.11      | [2.48,59.25] | <b>0.002</b> |
| Asia                                           | 1.10       | [0.48,2.50]  | 0.819        |
| North America                                  | 2.18       | [1.11,4.30]  | <b>0.024</b> |
| Oceania                                        | n.c.       |              |              |
| South America                                  | 0.44       | [0.05,4.23]  | 0.480        |
| Residency training                             |            |              |              |
| Family Medicine                                | Base       |              |              |
| Orthopedics                                    | 1.00       | [0.44,2.29]  | 0.998        |
| Internal Medicine                              | 0.68       | [0.23,2.02]  | 0.490        |
| PM&R                                           | 0.84       | [0.42,1.68]  | 0.620        |
| Pediatrics                                     | 0.69       | [0.30,1.58]  | 0.378        |
| Emergency Medicine                             | 1.05       | [0.36,3.11]  | 0.927        |
| Sports Medicine                                | 0.86       | [0.29,2.58]  | 0.790        |
| Other                                          | 1.17       | [0.27,5.08]  | 0.831        |
| Female athletic trainers                       | Odds Ratio | 95% CI       | p value      |
| Age                                            | 1.02       | [1.00,1.05]  | 0.086        |
| Region                                         |            |              |              |

|                                 |            |              |              |
|---------------------------------|------------|--------------|--------------|
| Europe                          | Base       |              |              |
| Africa                          | 7.16       | [2.02,25.47] | <b>0.002</b> |
| Asia                            | 1.22       | [0.49,3.04]  | 0.668        |
| North America                   | 2.44       | [1.13,5.27]  | <b>0.023</b> |
| Oceania                         | n.c.       |              |              |
| South America                   | 0.74       | [0.08,7.17]  | 0.792        |
| Residency training              |            |              |              |
| Family Medicine                 | Base       |              |              |
| Orthopedics                     | 1.20       | [0.49,2.93]  | 0.694        |
| Internal Medicine               | 0.27       | [0.06,1.32]  | 0.106        |
| PM&R                            | 1.42       | [0.70,2.89]  | 0.331        |
| Pediatrics                      | 0.99       | [0.42,2.34]  | 0.984        |
| Emergency Medicine              | 1.83       | [0.62,5.44]  | 0.277        |
| Sports Medicine                 | 1.02       | [0.29,3.62]  | 0.973        |
| Other                           | 4.13       | [0.91,18.71] | 0.066        |
| Organizations/Administrations   | Odds Ratio | 95% CI       | p value      |
| Age                             | 1.03       | [1.00,1.05]  | <b>0.046</b> |
| Region                          |            |              |              |
| Europe                          | Base       |              |              |
| Africa                          | 2.26       | [0.70,7.32]  | 0.173        |
| Asia                            | 0.75       | [0.33,1.71]  | 0.490        |
| North America                   | 1.77       | [0.90,3.47]  | 0.098        |
| Oceania                         | n.c.       |              |              |
| South America                   | 1.67       | [0.25,11.04] | 0.596        |
| Residency training              |            |              |              |
| Family Medicine                 | Base       |              |              |
| Orthopedics                     | 0.98       | [0.44,2.22]  | 0.969        |
| Internal Medicine               | 0.33       | [0.10,1.02]  | 0.053        |
| PM&R                            | 0.47       | [0.24,0.94]  | <b>0.033</b> |
| Pediatrics                      | 1.03       | [0.44,2.42]  | 0.943        |
| Emergency Medicine              | 0.48       | [0.16,1.44]  | 0.190        |
| Sports Medicine                 | 0.79       | [0.27,2.29]  | 0.663        |
| Other                           | 0.84       | [0.19,3.67]  | 0.819        |
| Male sports medicine physicians |            |              |              |
| Male athletes                   | Odds Ratio | 95% CI       | p value      |
| Age                             | 0.99       | [0.97,1.00]  | <b>0.038</b> |
| Region                          |            |              |              |
| Europe                          | Base       |              |              |
| Africa                          | 0.71       | [0.25,2.02]  | 0.517        |
| Asia                            | 0.52       | [0.34,0.81]  | <b>0.003</b> |
| North America                   | 1.30       | [0.81,2.06]  | 0.274        |
| Oceania                         | 0.86       | [0.08,9.60]  | 0.902        |
| South America                   | 1.26       | [0.54,2.93]  | 0.599        |
| Multiple                        | 0.27       | [0.02,3.50]  | 0.317        |

|                    |            |             |              |
|--------------------|------------|-------------|--------------|
| Residency training |            |             |              |
| Family Medicine    | Base       |             |              |
| Orthopedics        | 0.68       | [0.41,1.13] | 0.135        |
| Internal Medicine  | 0.60       | [0.29,1.24] | 0.167        |
| PM&R               | 0.71       | [0.39,1.32] | 0.284        |
| Pediatrics         | 0.82       | [0.28,2.44] | 0.725        |
| Emergency Medicine | 0.27       | [0.10,0.76] | <b>0.013</b> |
| Sports Medicine    | 2.37       | [0.95,5.88] | 0.063        |
| Other              | 0.62       | [0.28,1.41] | 0.255        |
| Female athletes    | Odds Ratio | 95% CI      | p value      |
| Age                | 0.99       | [0.97,1.00] | 0.071        |
| Region             |            |             |              |
| Europe             | Base       |             |              |
| Africa             | 1.54       | [0.53,4.47] | 0.423        |
| Asia               | 0.53       | [0.34,0.84] | <b>0.007</b> |
| North America      | 1.49       | [0.94,2.38] | 0.093        |
| Oceania            | 0.24       | [0.02,2.54] | 0.233        |
| South America      | 0.87       | [0.38,1.99] | 0.733        |
| Multiple           | 0.49       | [0.04,5.82] | 0.568        |
| Residency training |            |             |              |
| Family Medicine    | Base       |             |              |
| Orthopedics        | 0.51       | [0.30,0.86] | <b>0.011</b> |
| Internal Medicine  | 0.95       | [0.46,1.99] | 0.900        |
| PM&R               | 0.69       | [0.37,1.28] | 0.237        |
| Pediatrics         | 0.72       | [0.25,2.12] | 0.556        |
| Emergency Medicine | 0.23       | [0.08,0.67] | <b>0.007</b> |
| Sports Medicine    | 1.20       | [0.54,2.69] | 0.650        |
| Other              | 0.50       | [0.21,1.17] | 0.111        |
| Male coaches       | Odds Ratio | 95% CI      | p value      |
| Age                | 0.99       | [0.98,1.01] | 0.405        |
| Region             |            |             |              |
| Europe             | Base       |             |              |
| Africa             | 1.40       | [0.47,4.12] | 0.543        |
| Asia               | 0.58       | [0.37,0.89] | <b>0.014</b> |
| North America      | 1.42       | [0.89,2.27] | 0.138        |
| Oceania            | 0.71       | [0.06,8.06] | 0.785        |
| South America      | 1.05       | [0.45,2.45] | 0.915        |
| Multiple           | 0.27       | [0.02,3.57] | 0.321        |
| Residency training |            |             |              |
| Family Medicine    | Base       |             |              |
| Orthopedics        | 0.72       | [0.43,1.21] | 0.215        |
| Internal Medicine  | 0.90       | [0.44,1.88] | 0.787        |
| PM&R               | 0.63       | [0.34,1.16] | 0.138        |
| Pediatrics         | 0.89       | [0.30,2.65] | 0.838        |
| Emergency Medicine | 0.22       | [0.07,0.64] | <b>0.006</b> |

|                                              |            |              |                   |
|----------------------------------------------|------------|--------------|-------------------|
| Sports Medicine                              | 3.24       | [1.26,8.34]  | <b>0.015</b>      |
| Other                                        | 0.61       | [0.27,1.38]  | 0.238             |
| Female coaches                               | Odds Ratio | 95% CI       | p value           |
| Age                                          | 1.01       | [0.99,1.02]  | 0.431             |
| Region                                       |            |              |                   |
| Europe                                       | Base       |              |                   |
| Africa                                       | 5.64       | [1.76,18.05] | <b>0.004</b>      |
| Asia                                         | 0.91       | [0.56,1.47]  | 0.686             |
| North America                                | 1.78       | [1.11,2.88]  | <b>0.018</b>      |
| Oceania                                      | 0.25       | [0.02,2.69]  | 0.253             |
| South America                                | 1.31       | [0.56,3.11]  | 0.533             |
| Multiple                                     | 0.71       | [0.06,8.64]  | 0.789             |
| Residency training                           |            |              |                   |
| Family Medicine                              | Base       |              |                   |
| Orthopedics                                  | 0.48       | [0.28,0.82]  | <b>0.007</b>      |
| Internal Medicine                            | 0.78       | [0.37,1.63]  | 0.510             |
| PM&R                                         | 0.58       | [0.31,1.11]  | 0.100             |
| Pediatrics                                   | 0.61       | [0.21,1.78]  | 0.363             |
| Emergency Medicine                           | 0.23       | [0.07,0.74]  | <b>0.014</b>      |
| Sports Medicine                              | 1.93       | [0.85,4.40]  | 0.117             |
| Other                                        | 0.51       | [0.22,1.21]  | 0.126             |
| Male physicians in practice longer           | Odds Ratio | 95% CI       | p value           |
| Age                                          | 0.96       | [0.95,0.97]  | <b>&lt; 0.001</b> |
| Region                                       |            |              |                   |
| Europe                                       | Base       |              |                   |
| Africa                                       | 2.94       | [0.87,9.90]  | 0.082             |
| Asia                                         | 1.06       | [0.67,1.67]  | 0.804             |
| North America                                | 1.82       | [1.09,3.06]  | <b>0.023</b>      |
| Oceania                                      | 0.15       | [0.01,1.72]  | 0.128             |
| South America                                | 2.76       | [1.11,6.85]  | 0.029             |
| Multiple                                     | 0.42       | [0.03,5.92]  | 0.518             |
| Residency training                           |            |              |                   |
| Family Medicine                              | Base       |              |                   |
| Orthopedics                                  | 1.22       | [0.7,2.13]   | 0.474             |
| Internal Medicine                            | 1.11       | [0.51,2.44]  | 0.787             |
| PM&R                                         | 0.97       | [0.5,1.88]   | 0.926             |
| Pediatrics                                   | 4.04       | [0.85,19.22] | 0.080             |
| Emergency Medicine                           | 1.00       | [0.35,2.87]  | 0.994             |
| Sports Medicine                              | 2.98       | [1.18,7.51]  | <b>0.021</b>      |
| Other                                        | 1.22       | [0.54,2.78]  | 0.632             |
| Male physicians in practice the same or less | Odds Ratio | 95% CI       | p value           |
| Age                                          | 1.00       | [0.98,1.01]  | 0.750             |
| Region                                       |            |              |                   |
| Europe                                       | Base       |              |                   |

|                                                |            |              |                   |
|------------------------------------------------|------------|--------------|-------------------|
| Africa                                         | 3.12       | [1.07,9.07]  | <b>0.037</b>      |
| Asia                                           | 0.85       | [0.54,1.32]  | 0.465             |
| North America                                  | 1.28       | [0.80,2.05]  | 0.298             |
| Oceania                                        | 0.43       | [0.04,4.64]  | 0.490             |
| South America                                  | 0.91       | [0.40,2.10]  | 0.831             |
| Multiple                                       | 0.74       | [0.07,8.46]  | 0.811             |
| Residency training                             |            |              |                   |
| Family Medicine                                | Base       |              |                   |
| Orthopedics                                    | 1.25       | [0.74,2.11]  | 0.402             |
| Internal Medicine                              | 0.76       | [0.35,1.63]  | 0.483             |
| PM&R                                           | 1.06       | [0.57,1.97]  | 0.847             |
| Pediatrics                                     | 0.98       | [0.33,2.89]  | 0.975             |
| Emergency Medicine                             | 1.25       | [0.48,3.29]  | 0.644             |
| Sports Medicine                                | 1.37       | [0.61,3.05]  | 0.442             |
| Other                                          | 0.95       | [0.42,2.17]  | 0.903             |
| Female physicians in practice longer           | Odds Ratio | 95% CI       | p value           |
| Age                                            | 0.96       | [0.94,0.97]  | <b>&lt; 0.001</b> |
| Region                                         |            |              |                   |
| Europe                                         | Base       |              |                   |
| Africa                                         | 2.34       | [0.78,7.05]  | 0.129             |
| Asia                                           | 0.61       | [0.38,0.98]  | <b>0.040</b>      |
| North America                                  | 1.16       | [0.71,1.89]  | 0.550             |
| Oceania                                        | 0.54       | [0.21,1.38]  | 0.195             |
| South America                                  | 2.34       | [0.78,7.05]  | 0.129             |
| Multiple                                       | 0.68       | [0.05,8.68]  | 0.770             |
| Residency training                             |            |              |                   |
| Family Medicine                                | Base       |              |                   |
| Orthopedics                                    | 0.94       | [0.54,1.64]  | 0.834             |
| Internal Medicine                              | 0.90       | [0.41,1.98]  | 0.790             |
| PM&R                                           | 0.77       | [0.41,1.46]  | 0.426             |
| Pediatrics                                     | 1.16       | [0.39,3.48]  | 0.786             |
| Emergency Medicine                             | 0.63       | [0.22,1.81]  | 0.393             |
| Sports Medicine                                | 1.41       | [0.61,3.28]  | 0.420             |
| Other                                          | 0.77       | [0.30,1.94]  | 0.575             |
| Female physicians in practice the same or less | Odds Ratio | 95% CI       | p value           |
| Age                                            | 0.98       | [0.97,1.00]  | <b>0.017</b>      |
| Region                                         | 0.99       | [0.97,1.00]  | 0.083             |
| Europe                                         | Base       |              |                   |
| Africa                                         | 2.11       | [0.74,5.97]  | 0.161             |
| Asia                                           | 0.74       | [0.46,1.21]  | 0.230             |
| North America                                  | 1.15       | [0.69,1.91]  | 0.590             |
| Oceania                                        | n.c.       |              |                   |
| South America                                  | 1.02       | [0.43,2.44]  | 0.965             |
| Multiple                                       | 1.17       | [0.10,13.49] | 0.902             |

|                          |            |             |              |
|--------------------------|------------|-------------|--------------|
| Residency training       |            |             |              |
| Family Medicine          | Base       |             |              |
| Orthopedics              | 1.13       | [0.64,2.00] | 0.668        |
| Internal Medicine        | 1.05       | [0.47,2.35] | 0.904        |
| PM&R                     | 1.44       | [0.76,2.75] | 0.265        |
| Pediatrics               | 2.13       | [0.73,6.20] | 0.167        |
| Emergency Medicine       | 2.07       | [0.78,5.49] | 0.142        |
| Sports Medicine          | 1.43       | [0.62,3.30] | 0.407        |
| Other                    | 1.16       | [0.47,2.85] | 0.745        |
| Male athletic trainers   | Odds Ratio | 95% CI      | p value      |
| Age                      | 0.99       | [0.98,1.01] | 0.438        |
| Region                   |            |             |              |
| Europe                   | Base       |             |              |
| Africa                   | 1.60       | [0.56,4.61] | 0.382        |
| Asia                     | 0.60       | [0.38,0.94] | <b>0.026</b> |
| North America            | 0.86       | [0.54,1.39] | 0.548        |
| Oceania                  | 0.17       | [0.02,1.83] | 0.143        |
| South America            | 0.95       | [0.41,2.20] | 0.908        |
| Multiple                 | n.c.       |             |              |
| Residency training       |            |             |              |
| Family Medicine          | Base       |             |              |
| Orthopedics              | 0.80       | [0.47,1.36] | 0.406        |
| Internal Medicine        | 0.81       | [0.38,1.72] | 0.586        |
| PM&R                     | 0.86       | [0.46,1.59] | 0.626        |
| Pediatrics               | 0.74       | [0.24,2.25] | 0.590        |
| Emergency Medicine       | 0.24       | [0.07,0.88] | <b>0.031</b> |
| Sports Medicine          | 2.55       | [1.08,6.00] | <b>0.032</b> |
| Other                    | 0.91       | [0.40,2.09] | 0.832        |
| Female athletic trainers | Odds Ratio | 95% CI      | p value      |
| Age                      | 1.00       | [0.98,1.01] | 0.643        |
| Region                   |            |             |              |
| Europe                   | Base       |             |              |
| Africa                   | 2.51       | [0.86,7.29] | 0.092        |
| Asia                     | 0.66       | [0.40,1.09] | 0.103        |
| North America            | 1.15       | [0.70,1.92] | 0.578        |
| Oceania                  | 0.52       | [0.05,5.57] | 0.586        |
| South America            | 2.23       | [0.97,5.12] | 0.058        |
| Multiple                 | n.c.       |             |              |
| Residency training       |            |             |              |
| Family Medicine          | Base       |             |              |
| Orthopedics              | 0.73       | [0.41,1.29] | 0.278        |
| Internal Medicine        | 0.53       | [0.23,1.24] | 0.144        |
| PM&R                     | 0.77       | [0.40,1.49] | 0.444        |
| Pediatrics               | 0.84       | [0.27,2.59] | 0.766        |
| Emergency Medicine       | 0.19       | [0.04,0.86] | <b>0.031</b> |

|                               |            |              |         |
|-------------------------------|------------|--------------|---------|
| Sports Medicine               | 1.28       | [0.55,2.96]  | 0.571   |
| Other                         | 0.52       | [0.19,1.41]  | 0.198   |
| Organizations/Administrations | Odds Ratio | 95% CI       | p value |
| Age                           | 0.99       | [0.98,1.01]  | 0.435   |
| Region                        |            |              |         |
| Europe                        | Base       |              |         |
| Africa                        | 2.20       | [0.74,6.53]  | 0.155   |
| Asia                          | 0.82       | [0.53,1.28]  | 0.388   |
| North America                 | 0.84       | [0.53,1.35]  | 0.476   |
| Oceania                       | 1.15       | [0.10,12.65] | 0.909   |
| South America                 | 1.93       | [0.83,4.49]  | 0.127   |
| Multiple                      | 0.41       | [0.03,5.22]  | 0.490   |
| Residency training            |            |              |         |
| Family Medicine               | Base       |              |         |
| Orthopedics                   | 0.72       | [0.43,1.21]  | 0.215   |
| Internal Medicine             | 1.08       | [0.53,2.23]  | 0.829   |
| PM&R                          | 0.65       | [0.35,1.21]  | 0.177   |
| Pediatrics                    | 0.48       | [0.14,1.59]  | 0.230   |
| Emergency Medicine            | 0.50       | [0.18,1.40]  | 0.189   |
| Sports Medicine               | 2.88       | [1.20,6.91]  | 0.018   |
| Other                         | 0.98       | [0.45,2.16]  | 0.966   |

1 PM&R; physical medicine and rehabilitation, 95 % CI; 95 % confidence interval, n.c; not  
2 calculated

3

4

## 1 Table 7 Full results of logistic regression on having sexually harassed (both genders combined)

| Male athletes      | Odds Ratio | 95% CI         | p value           |
|--------------------|------------|----------------|-------------------|
| Gender             |            |                |                   |
| Male               | Base       |                |                   |
| Female             | 12.42      | [6.14,25.11]   | <b>&lt; 0.001</b> |
| Age                | 0.96       | [0.93,0.99]    | <b>0.021</b>      |
| Region             |            |                |                   |
| Europe             | Base       |                |                   |
| Africa             | 7.65       | [2.42,24.19]   | <b>0.001</b>      |
| Asia               | 2.76       | [1.01,7.56]    | <b>0.048</b>      |
| North America      | 1.35       | [0.56,3.22]    | 0.503             |
| Oceania            | 127.40     | [7.05,2301.59] | <b>0.001</b>      |
| South America      | 7.60       | [1.29,44.79]   | <b>0.025</b>      |
| Multiple           | n.c.       |                |                   |
| Residency training |            |                |                   |
| Family Medicine    | Base       |                |                   |
| Orthopedics        | 0.43       | [0.16,1.18]    | 0.101             |
| Internal Medicine  | 0.33       | [0.07,1.57]    | 0.165             |
| PM&R               | 0.66       | [0.30,1.48]    | 0.314             |
| Pediatrics         | 0.22       | [0.05,1.01]    | 0.051             |
| Emergency Medicine | 0.42       | [0.09,1.90]    | 0.257             |
| Sports Medicine    | 0.13       | [0.01,1.18]    | 0.070             |
| Other              | 1.34       | [0.31,5.81]    | 0.699             |
| Female athletes    | Odds Ratio | 95% CI         | p value           |
| Gender             |            |                |                   |
| Male               | Base       |                |                   |
| Female             | 0.41       | [0.17,0.97]    | <b>0.043</b>      |
| Age                | 0.97       | [0.94,1.00]    | 0.062             |
| Region             |            |                |                   |
| Europe             | Base       |                |                   |
| Africa             | 4.18       | [1.30,13.46]   | <b>0.016</b>      |
| Asia               | 0.79       | [0.29,2.14]    | 0.638             |
| North America      | 0.42       | [0.15,1.24]    | 0.117             |
| Oceania            | 80.84      | [6.10,1072.17] | <b>0.001</b>      |
| South America      | 4.75       | [1.25,18.02]   | <b>0.022</b>      |
| Multiple           | 4.18       | [1.30,13.46]   | <b>0.016</b>      |
| Residency training |            |                |                   |
| Family Medicine    | Base       |                |                   |
| Orthopedics        | 0.89       | [0.27,2.93]    | 0.847             |
| Internal Medicine  | 0.89       | [0.16,4.86]    | 0.897             |
| PM&R               | 2.56       | [0.91,7.21]    | 0.075             |
| Pediatrics         | n.c.       |                |                   |
| Emergency Medicine | 0.83       | [0.09,7.50]    | 0.871             |
| Sports Medicine    | 0.27       | [0.03,2.55]    | 0.254             |
| Other              | 1.62       | [0.29,9.21]    | 0.585             |

| Male coaches                       | Odds Ratio | 95% CI        | p value           |
|------------------------------------|------------|---------------|-------------------|
| Gender                             |            |               |                   |
| Male                               | Base       |               |                   |
| Female                             | 9.95       | [4.58,21.62]  | <b>&lt; 0.001</b> |
| Age                                | 0.97       | [0.94,1.00]   | 0.093             |
| Region                             |            |               |                   |
| Europe                             | Base       |               |                   |
| Africa                             | 7.89       | [2.34,26.66]  | <b>0.001</b>      |
| Asia                               | 2.77       | [0.85,9.01]   | 0.092             |
| North America                      | 1.17       | [0.44,3.13]   | 0.756             |
| Oceania                            | 53.60      | [4.65,617.19] | <b>0.001</b>      |
| South America                      | 6.47       | [1.07,39.16]  | <b>0.042</b>      |
| Multiple                           | n.c.       |               |                   |
| Residency training                 |            |               |                   |
| Family Medicine                    | Base       |               |                   |
| Orthopedics                        | 0.31       | [0.09,1.00]   | 0.050             |
| Internal Medicine                  | 0.44       | [0.09,2.09]   | 0.302             |
| PM&R                               | 0.54       | [0.21,1.39]   | 0.205             |
| Pediatrics                         | 0.73       | [0.23,2.35]   | 0.600             |
| Emergency Medicine                 | n.c.       |               |                   |
| Sports Medicine                    | 0.36       | [0.06,1.98]   | 0.237             |
| Other                              | 0.94       | [0.17,5.17]   | 0.940             |
| Female coaches                     | Odds Ratio | 95% CI        | p value           |
| Gender                             |            |               |                   |
| Male                               | Base       |               |                   |
| Female                             | 0.31       | [0.09,1.15]   | 0.080             |
| Age                                | 0.95       | [0.90,0.99]   | <b>0.027</b>      |
| Region                             |            |               |                   |
| Europe                             | Base       |               |                   |
| Africa                             | 4.39       | [0.80,23.92]  | 0.088             |
| Asia                               | 1.39       | [0.37,5.16]   | 0.622             |
| North America                      | 0.73       | [0.16,3.42]   | 0.690             |
| Oceania                            | n.c.       |               |                   |
| South America                      | 2.63       | [0.25,27.18]  | 0.417             |
| Multiple                           | n.c.       |               |                   |
| Residency training                 |            |               |                   |
| Family Medicine                    | Base       |               |                   |
| Orthopedics                        | 2.10       | [0.37,12.05]  | 0.404             |
| Internal Medicine                  | n.c.       |               |                   |
| PM&R                               | 4.01       | [0.87,18.52]  | 0.075             |
| Pediatrics                         | n.c.       |               |                   |
| Emergency Medicine                 | 2.36       | [0.22,25.63]  | 0.481             |
| Sports Medicine                    | n.c.       |               |                   |
| Other                              | 5.43       | [0.66,45.02]  | 0.117             |
| Male physicians in practice longer | Odds Ratio | 95% CI        | p value           |

|                                              |            |               |                   |
|----------------------------------------------|------------|---------------|-------------------|
| Gender                                       |            |               |                   |
| Male                                         | Base       |               |                   |
| Female                                       | 27.47      | [14.33,52.65] | <b>&lt; 0.001</b> |
| Age                                          | 0.99       | [0.96,1.01]   | 0.224             |
| Region                                       |            |               |                   |
| Europe                                       | Base       |               |                   |
| Africa                                       | 2.35       | [0.74,7.51]   | 0.149             |
| Asia                                         | 1.40       | [0.65,3.06]   | 0.392             |
| North America                                | 1.86       | [0.91,3.82]   | 0.089             |
| Oceania                                      | n.c.       |               |                   |
| South America                                | 3.26       | [0.76,14.09]  | 0.113             |
| Multiple                                     | n.c.       |               |                   |
| Residency training                           |            |               |                   |
| Family Medicine                              | Base       |               |                   |
| Orthopedics                                  | 1.80       | [0.82,3.95]   | 0.144             |
| Internal Medicine                            | 0.42       | [0.11,1.52]   | 0.186             |
| PM&R                                         | 0.60       | [0.29,1.26]   | 0.178             |
| Pediatrics                                   | 0.13       | [0.03,0.55]   | <b>0.006</b>      |
| Emergency Medicine                           | 0.40       | [0.11,1.43]   | 0.158             |
| Sports Medicine                              | 0.69       | [0.21,2.31]   | 0.551             |
| Other                                        | 2.68       | [0.74,9.70]   | 0.132             |
| Male physicians in practice the same or less | Odds Ratio | 95% CI        | p value           |
| Gender                                       |            |               |                   |
| Male                                         | Base       |               |                   |
| Female                                       | 13.77      | [6.54,28.99]  | <b>&lt; 0.001</b> |
| Age                                          | 0.99       | [0.96,1.02]   | 0.363             |
| Region                                       |            |               |                   |
| Europe                                       | Base       |               |                   |
| Africa                                       | 0.47       | [0.06,3.99]   | 0.491             |
| Asia                                         | 1.25       | [0.50,3.10]   | 0.638             |
| North America                                | 1.46       | [0.61,3.47]   | 0.394             |
| Oceania                                      | n.c.       |               |                   |
| South America                                | 4.68       | [1.08,20.16]  | <b>0.039</b>      |
| Multiple                                     | n.c.       |               |                   |
| Residency training                           |            |               |                   |
| Family Medicine                              | Base       |               |                   |
| Orthopedics                                  | 1.67       | [0.64,4.35]   | 0.293             |
| Internal Medicine                            | 0.66       | [0.14,3.07]   | 0.593             |
| PM&R                                         | 0.93       | [0.38,2.28]   | 0.878             |
| Pediatrics                                   | 0.36       | [0.08,1.59]   | 0.177             |
| Emergency Medicine                           | 0.66       | [0.14,3.04]   | 0.595             |
| Sports Medicine                              | 0.77       | [0.17,3.40]   | 0.725             |
| Other                                        | 2.57       | [0.57,11.56]  | 0.219             |
| Female physicians in practice                | Odds Ratio | 95% CI        | p value           |

|                                                |                    |      |              |              |
|------------------------------------------------|--------------------|------|--------------|--------------|
|                                                | longer             |      |              |              |
| Gender                                         |                    |      |              |              |
|                                                | Male               | Base |              |              |
|                                                | Female             | 1.03 | [0.36,3.01]  | 0.950        |
| Age                                            |                    | 0.99 | [0.95,1.03]  | 0.627        |
| Region                                         |                    |      |              |              |
|                                                | Europe             | Base |              |              |
|                                                | Africa             | 5.05 | [0.79,32.18] | 0.087        |
|                                                | Asia               | 1.18 | [0.32,4.37]  | 0.799        |
|                                                | North America      | 1.06 | [0.22,5.11]  | 0.945        |
|                                                | Oceania            | n.c. |              |              |
|                                                | South America      | 4.51 | [0.73,27.83] | 0.105        |
|                                                | Multiple           | n.c. |              |              |
| Residency training                             |                    |      |              |              |
|                                                | Family Medicine    | Base |              |              |
|                                                | Orthopedics        | 1.85 | [0.37,9.17]  | 0.450        |
|                                                | Internal Medicine  | n.c. |              |              |
|                                                | PM&R               | 1.38 | [0.28,6.74]  | 0.688        |
|                                                | Pediatrics         | n.c. |              |              |
|                                                | Emergency Medicine | n.c. |              |              |
|                                                | Sports Medicine    | 0.82 | [0.07,9.64]  | 0.875        |
|                                                | Other              | 3.61 | [0.49,26.67] | 0.209        |
| Female physicians in practice the same or less | Odds Ratio         |      | 95% CI       | p value      |
| Gender                                         |                    |      |              |              |
|                                                | Male               | Base |              |              |
|                                                | Female             | 0.61 | [0.20,1.84]  | 0.382        |
| Age                                            |                    | 0.98 | [0.94,1.02]  | 0.326        |
| Region                                         |                    |      |              |              |
|                                                | Europe             | Base |              |              |
|                                                | Africa             | 6.40 | [1.22,33.52] | <b>0.028</b> |
|                                                | Asia               | 1.70 | [0.50,5.81]  | 0.398        |
|                                                | North America      | 0.63 | [0.13,3.01]  | 0.560        |
|                                                | Oceania            | n.c. |              |              |
|                                                | South America      | 4.19 | [0.68,25.71] | 0.122        |
|                                                | Multiple           | n.c. |              |              |
| Residency training                             |                    |      |              |              |
|                                                | Family Medicine    | Base |              |              |
|                                                | Orthopedics        | 1.71 | [0.37,7.98]  | 0.492        |
|                                                | Internal Medicine  | 0.85 | [0.08,8.78]  | 0.892        |
|                                                | PM&R               | 1.66 | [0.36,7.73]  | 0.517        |
|                                                | Pediatrics         | 2.12 | [0.22,20.67] | 0.517        |
|                                                | Emergency Medicine | n.c. |              |              |
|                                                | Sports Medicine    | n.c. |              |              |
|                                                | Other              | 2.65 | [0.36,19.23] | 0.336        |

| Male athletic trainers        | Odds Ratio | 95% CI       | p value           |
|-------------------------------|------------|--------------|-------------------|
| Gender                        |            |              |                   |
| Male                          | Base       |              |                   |
| Female                        | 5.40       | [2.46,11.85] | <b>&lt; 0.001</b> |
| Age                           | 0.99       | [0.96,1.03]  | 0.666             |
| Region                        |            |              |                   |
| Europe                        | Base       |              |                   |
| Africa                        | 1.84       | [0.43,7.75]  | 0.408             |
| Asia                          | 1.67       | [0.58,4.85]  | 0.344             |
| North America                 | 0.48       | [0.18,1.29]  | 0.144             |
| Oceania                       | n.c.       |              |                   |
| South America                 | 3.43       | [0.63,18.80] | 0.155             |
| Multiple                      | n.c.       |              |                   |
| Residency training            |            |              |                   |
| Family Medicine               | Base       |              |                   |
| Orthopedics                   | 0.45       | [0.14,1.42]  | 0.174             |
| Internal Medicine             | n.c.       |              |                   |
| PM&R                          | 0.71       | [0.24,2.09]  | 0.529             |
| Pediatrics                    | 0.80       | [0.17,3.81]  | 0.776             |
| Emergency Medicine            | 0.48       | [0.06,3.89]  | 0.493             |
| Sports Medicine               | 0.38       | [0.07,2.06]  | 0.262             |
| Other                         | 0.83       | [0.15,4.57]  | 0.830             |
| Female athletic trainers      | Odds Ratio | 95% CI       | p value           |
| Gender                        |            |              |                   |
| Male                          | Base       |              |                   |
| Female                        | 0.29       | [0.08,1.10]  | 0.069             |
| Age                           | 0.95       | [0.91,1.00]  | 0.050             |
| Region                        |            |              |                   |
| Europe                        | Base       |              |                   |
| Africa                        | 3.37       | [0.50,22.80] | 0.213             |
| Asia                          | 3.13       | [0.69,14.13] | 0.139             |
| North America                 | 0.54       | [0.11,2.71]  | 0.455             |
| Oceania                       | n.c.       |              |                   |
| South America                 | 3.97       | [0.35,45.18] | 0.267             |
| Multiple                      | n.c.       |              |                   |
| Residency training            |            |              |                   |
| Family Medicine               | Base       |              |                   |
| Orthopedics                   | 0.43       | [0.08,2.41]  | 0.338             |
| Internal Medicine             | 1.52       | [0.22,10.44] | 0.667             |
| PM&R                          | 1.05       | [0.20,5.64]  | 0.955             |
| Pediatrics                    | 2.61       | [0.26,25.74] | 0.411             |
| Emergency Medicine            | 1.70       | [0.17,17.04] | 0.653             |
| Sports Medicine               | n.c.       |              |                   |
| Other                         | 1.81       | [0.23,14.13] | 0.573             |
| Organizations/Administrations | Odds Ratio | 95% CI       | p value           |

|                    |       |               |                   |
|--------------------|-------|---------------|-------------------|
| Gender             |       |               |                   |
| Male               | Base  |               |                   |
| Female             | 7.31  | [3.50,15.27]  | <b>&lt; 0.001</b> |
| Age                | 1.01  | [0.98,1.04]   | 0.580             |
| Region             |       |               |                   |
| Europe             | Base  |               |                   |
| Africa             | 11.51 | [3.27,40.53]  | <b>&lt; 0.001</b> |
| Asia               | 3.38  | [0.99,11.46]  | 0.051             |
| North America      | 1.37  | [0.48,3.92]   | 0.552             |
| Oceania            | 35.78 | [4.08,313.38] | <b>0.001</b>      |
| South America      | 5.17  | [0.87,30.69]  | 0.071             |
| Multiple           | n.c.  |               |                   |
| Residency training |       |               |                   |
| Family Medicine    | Base  |               |                   |
| Orthopedics        | 0.25  | [0.07,0.83]   | <b>0.023</b>      |
| Internal Medicine  | n.c.  |               |                   |
| PM&R               | 0.58  | [0.22,1.56]   | 0.284             |
| Pediatrics         | 0.89  | [0.28,2.84]   | 0.838             |
| Emergency Medicine | 0.32  | [0.04,2.49]   | 0.274             |
| Sports Medicine    | 0.60  | [0.13,2.71]   | 0.502             |
| Other              | 0.67  | [0.12,3.81]   | 0.656             |

PM&R; physical medicine and rehabilitation, 95 % CI; 95 % confidence interval, n.c; not calculated

## 1 Table 8 Full results of logistic regression on having sexually harassed (both genders separately)

| Female sports medicine physicians |            |               |              |
|-----------------------------------|------------|---------------|--------------|
| Male athletes                     | Odds Ratio | 95% CI        | p value      |
| Age                               | 0.98       | [0.95,1.02]   | 0.278        |
| Region                            |            |               |              |
| Europe                            | Base       |               |              |
| Africa                            | 7.54       | [2.12,26.78]  | <b>0.002</b> |
| Asia                              | 1.10       | [0.32,3.75]   | 0.882        |
| North America                     | 1.44       | [0.56,3.70]   | 0.454        |
| Oceania                           | n.c.       |               |              |
| South America                     | 4.56       | [0.40,52.11]  | 0.223        |
| Residency training                |            |               |              |
| Family Medicine                   | Base       |               |              |
| Orthopedics                       | 0.70       | [0.23,2.18]   | 0.543        |
| Internal Medicine                 | 0.48       | [0.10,2.32]   | 0.360        |
| PM&R                              | 0.54       | [0.21,1.35]   | 0.188        |
| Pediatrics                        | 0.23       | [0.05,1.06]   | 0.059        |
| Emergency Medicine                | 0.53       | [0.11,2.43]   | 0.410        |
| Sports Medicine                   | 0.17       | [0.02,1.56]   | 0.117        |
| Other                             | 1.78       | [0.29,11.10]  | 0.535        |
| Female athletes                   | Odds Ratio | 95% CI        | p value      |
| Age                               | 1.06       | [0.96,1.17]   | 0.269        |
| Region                            |            |               |              |
| Europe                            | Base       |               |              |
| Africa                            | 9.18       | [0.48,176.29] | 0.142        |
| Asia                              | 0.46       | [0.04,6.00]   | 0.554        |
| North America                     | 0.77       | [0.05,12.77]  | 0.857        |
| Oceania                           | n.c.       |               |              |
| South America                     | n.c.       |               |              |
| Residency training                |            |               |              |
| Family Medicine                   | Base       |               |              |
| Orthopedics                       | 0.24       | [0.02,3.52]   | 0.296        |
| Internal Medicine                 | n.c.       |               |              |
| PM&R                              | 0.09       | [0.00,2.57]   | 0.160        |
| Pediatrics                        | n.c.       |               |              |
| Emergency Medicine                | 0.50       | [0.02,14.60]  | 0.685        |
| Sports Medicine                   | n.c.       |               |              |
| Other                             | n.c.       |               |              |
| Male coaches                      | Odds Ratio | 95% CI        | p value      |
| Age                               | 1          | [0.96,1.04]   | 0.995        |
| Region                            |            |               |              |
| Europe                            | Base       |               |              |
| Africa                            | 6.55       | [1.74,24.67]  | <b>0.005</b> |
| Asia                              | 0.68       | [0.12,3.79]   | 0.659        |
| North America                     | 1.18       | [0.41,3.40]   | 0.766        |

|                                    |            |              |              |
|------------------------------------|------------|--------------|--------------|
| Oceania                            | n.c.       |              |              |
| South America                      | 3.22       | [0.29,35.31] | 0.339        |
| Residency training                 |            |              |              |
| Family Medicine                    | Base       |              |              |
| Orthopedics                        | 0.37       | [0.09,1.60]  | 0.185        |
| Internal Medicine                  | 0.65       | [0.13,3.28]  | 0.603        |
| PM&R                               | 0.46       | [0.15,1.38]  | 0.166        |
| Pediatrics                         | 0.75       | [0.23,2.41]  | 0.631        |
| Emergency Medicine                 | n.c.       |              |              |
| Sports Medicine                    | 0.41       | [0.07,2.42]  | 0.328        |
| Other                              | 1.00       | [0.10,10.19] | 0.998        |
| Female coaches                     | Odds Ratio | 95% CI       | p value      |
| Age                                | 1.05       | [0.93,1.18]  | 0.416        |
| Region                             |            |              |              |
| Europe                             | Base       |              |              |
| Africa                             | 0.98       | [0.05,19.34] | 0.987        |
| Asia                               | n.c.       |              |              |
| North America                      | 1.98       | [0.06,65.93] | 0.702        |
| Oceania                            | n.c.       |              |              |
| South America                      | n.c.       |              |              |
| Residency training                 |            |              |              |
| Family Medicine                    | Base       |              |              |
| Orthopedics                        | 0.15       | [0.01,3.09]  | 0.218        |
| Internal Medicine                  | n.c.       |              |              |
| PM&R                               | n.c.       |              |              |
| Pediatrics                         | n.c.       |              |              |
| Emergency Medicine                 | 0.34       | [0.01,16.81] | 0.586        |
| Sports Medicine                    | n.c.       |              |              |
| Other                              | n.c.       |              |              |
| Male physicians in practice longer | Odds Ratio | 95% CI       | p value      |
| Age                                | 1.00       | [0.97,1.03]  | 0.954        |
| Region                             |            |              |              |
| Europe                             | Base       |              |              |
| Africa                             | 1.84       | [0.52,6.60]  | 0.346        |
| Asia                               | 0.69       | [0.26,1.83]  | 0.458        |
| North America                      | 2.02       | [0.92,4.46]  | 0.081        |
| Oceania                            | n.c.       |              |              |
| South America                      | 3.25       | [0.41,25.70] | 0.264        |
| Residency training                 |            |              |              |
| Family Medicine                    | Base       |              |              |
| Orthopedics                        | 2.70       | [1.10,6.63]  | <b>0.030</b> |
| Internal Medicine                  | 0.50       | [0.13,1.87]  | 0.301        |
| PM&R                               | 0.45       | [0.20,1.03]  | 0.058        |
| Pediatrics                         | 0.12       | [0.03,0.54]  | <b>0.006</b> |
| Emergency Medicine                 | 0.42       | [0.11,1.54]  | 0.191        |

|                                                |            |               |              |
|------------------------------------------------|------------|---------------|--------------|
| Sports Medicine                                | 0.73       | [0.20,2.58]   | 0.621        |
| Other                                          | 2.21       | [0.44,11.23]  | 0.337        |
| Male physicians in practice the same or less   | Odds Ratio | 95% CI        | p value      |
| Age                                            | 1.00       | [0.96,1.03]   | 0.919        |
| Region                                         |            |               |              |
| Europe                                         | Base       |               |              |
| Africa                                         | n.c.       |               |              |
| Asia                                           | 0.61       | [0.19,2.00]   | 0.413        |
| North America                                  | 1.86       | [0.70,4.97]   | 0.217        |
| Oceania                                        | n.c.       |               |              |
| South America                                  | 1.87       | [0.17,20.50]  | 0.610        |
| Residency training                             |            |               |              |
| Family Medicine                                | Base       |               |              |
| Orthopedics                                    | 2.90       | [0.97,8.70]   | 0.057        |
| Internal Medicine                              | 0.94       | [0.19,4.57]   | 0.934        |
| PM&R                                           | 0.92       | [0.34,2.49]   | 0.875        |
| Pediatrics                                     | 0.18       | [0.02,1.39]   | 0.101        |
| Emergency Medicine                             | 0.74       | [0.16,3.48]   | 0.704        |
| Sports Medicine                                | 1.21       | [0.25,5.94]   | 0.811        |
| Other                                          | 3.41       | [0.52,22.24]  | 0.200        |
| Female physicians in practice longer           | Odds Ratio | 95% CI        | p value      |
| Age                                            | 1.11       | [1.01,1.21]   | <b>0.024</b> |
| Region                                         |            |               |              |
| Europe                                         | Base       |               |              |
| Africa                                         | n.c.       |               |              |
| Asia                                           | 2.49       | [0.17,35.84]  | 0.503        |
| North America                                  | 1.18       | [0.06,24.38]  | 0.914        |
| Oceania                                        | n.c.       |               |              |
| South America                                  | n.c.       |               |              |
| Residency training                             |            |               |              |
| Family Medicine                                | Base       |               |              |
| Orthopedics                                    | 1.65       | [0.08,32.03]  | 0.741        |
| Internal Medicine                              | n.c.       |               |              |
| PM&R                                           | n.c.       |               |              |
| Pediatrics                                     | n.c.       |               |              |
| Emergency Medicine                             | n.c.       |               |              |
| Sports Medicine                                | 1.81       | [0.04,76.59]  | 0.755        |
| Other                                          | 3.67       | [0.07,181.37] | 0.513        |
| Female physicians in practice the same or less | Odds Ratio | 95% CI        | p value      |
| Age                                            | 1.09       | [0.99,1.19]   | 0.090        |
| Region                                         |            |               |              |
| Europe                                         | Base       |               |              |
| Africa                                         | n.c.       |               |              |

|                          |            |               |         |
|--------------------------|------------|---------------|---------|
| Asia                     | 2.54       | [0.19,34.72]  | 0.485   |
| North America            | 1.23       | [0.05,27.84]  | 0.897   |
| Oceania                  | n.c.       |               |         |
| South America            | n.c.       |               |         |
| Residency training       |            |               |         |
| Family Medicine          | Base       |               |         |
| Orthopedics              | 1.85       | [0.09,39.23]  | 0.692   |
| Internal Medicine        | n.c.       |               |         |
| PM&R                     | n.c.       |               |         |
| Pediatrics               | n.c.       |               |         |
| Emergency Medicine       | n.c.       |               |         |
| Sports Medicine          | n.c.       |               |         |
| Other                    | 4.34       | [0.09,220.67] | 0.464   |
| Male athletic trainers   | Odds Ratio | 95% CI        | p value |
| Age                      | 1.03       | [0.99,1.08]   | 0.125   |
| Region                   |            |               |         |
| Europe                   | Base       |               |         |
| Africa                   | 1.41       | [0.24,8.13]   | 0.703   |
| Asia                     | 0.73       | [0.16,3.27]   | 0.677   |
| North America            | 0.61       | [0.19,2.04]   | 0.427   |
| Oceania                  | n.c.       |               |         |
| South America            | n.c.       |               |         |
| Residency training       |            |               |         |
| Family Medicine          | Base       |               |         |
| Orthopedics              | 0.90       | [0.23,3.55]   | 0.882   |
| Internal Medicine        | n.c.       |               |         |
| PM&R                     | 0.36       | [0.07,1.84]   | 0.221   |
| Pediatrics               | 0.44       | [0.06,3.57]   | 0.445   |
| Emergency Medicine       | 0.60       | [0.07,5.03]   | 0.637   |
| Sports Medicine          | 0.54       | [0.09,3.41]   | 0.516   |
| Other                    | 0.99       | [0.09,10.88]  | 0.992   |
| Female athletic trainers | Odds Ratio | 95% CI        | p value |
| Age                      | 1.05       | [0.93,1.19]   | 0.430   |
| Region                   |            |               |         |
| Europe                   | Base       |               |         |
| Africa                   | n.c.       |               |         |
| Asia                     | 1.01       | [0.05,20.16]  | 0.995   |
| North America            | 2.03       | [0.06,68.36]  | 0.693   |
| Oceania                  | n.c.       |               |         |
| South America            | n.c.       |               |         |
| Residency training       |            |               |         |
| Family Medicine          | Base       |               |         |
| Orthopedics              | 0.15       | [0.01,3.03]   | 0.214   |
| Internal Medicine        | n.c.       |               |         |
| PM&R                     | n.c.       |               |         |

|                                 |            |               |              |
|---------------------------------|------------|---------------|--------------|
| Pediatrics                      | n.c.       |               |              |
| Emergency Medicine              | 0.33       | [0.01,16.94]  | 0.585        |
| Sports Medicine                 | n.c.       |               |              |
| Other                           | n.c.       |               |              |
| Organizations/Administrations   | Odds Ratio | 95% CI        | p value      |
| Age                             | 1.05       | [1.01,1.09]   | <b>0.008</b> |
| Region                          |            |               |              |
| Europe                          | Base       |               |              |
| Africa                          | 8.94       | [1.83,43.73]  | <b>0.007</b> |
| Asia                            | 1.81       | [0.33,10.05]  | 0.498        |
| North America                   | 2.11       | [0.57,7.82]   | 0.264        |
| Oceania                         | n.c.       |               |              |
| South America                   | 3.86       | [0.34,43.90]  | 0.276        |
| Residency training              |            |               |              |
| Family Medicine                 | Base       |               |              |
| Orthopedics                     | 0.35       | [0.08,1.61]   | 0.177        |
| Internal Medicine               | n.c.       |               |              |
| PM&R                            | 0.30       | [0.08,1.23]   | 0.095        |
| Pediatrics                      | 0.64       | [0.18,2.36]   | 0.505        |
| Emergency Medicine              | 0.40       | [0.05,3.21]   | 0.386        |
| Sports Medicine                 | 0.83       | [0.15,4.74]   | 0.834        |
| Other                           | 0.90       | [0.07,11.29]  | 0.937        |
| Male sports medicine physicians |            |               |              |
| Male athletes                   | Odds Ratio | 95% CI        | p value      |
| Age                             | 0.92       | [0.85,0.99]   | <b>0.023</b> |
| Region                          |            |               |              |
| Europe                          | Base       |               |              |
| Africa                          | n.c.       |               |              |
| Asia                            | 5.21       | [0.39,69.43]  | 0.212        |
| North America                   | 0.13       | [0.01,1.88]   | 0.133        |
| Oceania                         | n.c.       |               |              |
| South America                   | 12.47      | [0.41,375.97] | 0.146        |
| Multiple                        | n.c.       |               |              |
| Residency training              |            |               |              |
| Family Medicine                 | Base       |               |              |
| Orthopedics                     | 0.04       | [0.00,0.43]   | <b>0.007</b> |
| Internal Medicine               | n.c.       |               |              |
| PM&R                            | 0.52       | [0.06,4.76]   | 0.562        |
| Pediatrics                      | n.c.       |               |              |
| Emergency Medicine              | n.c.       |               |              |
| Sports Medicine                 | n.c.       |               |              |
| Other                           | 0.26       | [0.01,4.55]   | 0.354        |
| Female athletes                 | Odds Ratio | 95% CI        | p value      |
| Age                             | 0.97       | [0.93,1.00]   | 0.076        |
| Region                          |            |               |              |

|                    |            |               |              |
|--------------------|------------|---------------|--------------|
| Europe             | Base       |               |              |
| Africa             | 5.73       | [1.43,23.03]  | <b>0.014</b> |
| Asia               | 1.01       | [0.33,3.13]   | 0.987        |
| North America      | 0.47       | [0.15,1.5]    | 0.202        |
| Oceania            | n.c.       |               |              |
| South America      | 6.13       | [1.46,25.79]  | <b>0.013</b> |
| Multiple           | n.c.       |               |              |
| Residency training |            |               |              |
| Family Medicine    | Base       |               |              |
| Orthopedics        | 0.51       | [0.14,1.87]   | 0.308        |
| Internal Medicine  | 0.68       | [0.11,4.00]   | 0.668        |
| PM&R               | 2.21       | [0.73,6.71]   | 0.163        |
| Pediatrics         | n.c.       |               |              |
| Emergency Medicine | n.c.       |               |              |
| Sports Medicine    | 0.22       | [0.02,2.19]   | 0.197        |
| Other              | 0.58       | [0.06,5.62]   | 0.636        |
| Male coaches       | Odds Ratio | 95% CI        | p value      |
| Age                | 0.88       | [0.81,0.96]   | <b>0.006</b> |
| Region             |            |               |              |
| Europe             | Base       |               |              |
| Africa             | n.c.       |               |              |
| Asia               | 5.72       | [0.34,95.46]  | 0.225        |
| North America      | 0.06       | [0.00,1.26]   | 0.070        |
| Oceania            | n.c.       |               |              |
| South America      | 20.08      | [0.53,766.61] | 0.106        |
| Multiple           | n.c.       |               |              |
| Residency training |            |               |              |
| Family Medicine    | Base       |               |              |
| Orthopedics        | 0.04       | [0.00,0.65]   | <b>0.023</b> |
| Internal Medicine  | n.c.       |               |              |
| PM&R               | 0.30       | [0.02,4.44]   | 0.384        |
| Pediatrics         | n.c.       |               |              |
| Emergency Medicine | n.c.       |               |              |
| Sports Medicine    | n.c.       |               |              |
| Other              | 0.40       | [0.02,9.65]   | 0.573        |
| Female coaches     | Odds Ratio | 95% CI        | p value      |
| Age                | 0.94       | [0.89,0.99]   | <b>0.019</b> |
| Region             |            |               |              |
| Europe             | Base       |               |              |
| Africa             | 7.13       | [1.07,47.65]  | <b>0.043</b> |
| Asia               | 1.67       | [0.37,7.54]   | 0.508        |
| North America      | 0.74       | [0.13,4.22]   | 0.732        |
| Oceania            | n.c.       |               |              |
| South America      | 3.27       | [0.28,37.56]  | 0.342        |
| Multiple           | n.c.       |               |              |

|                                              |            |               |              |
|----------------------------------------------|------------|---------------|--------------|
| Residency training                           |            |               |              |
| Family Medicine                              | Base       |               |              |
| Orthopedics                                  | 1.47       | [0.22,9.71]   | 0.687        |
| Internal Medicine                            | n.c.       |               |              |
| PM&R                                         | 3.52       | [0.71,17.34]  | 0.122        |
| Pediatrics                                   | n.c.       |               |              |
| Emergency Medicine                           | n.c.       |               |              |
| Sports Medicine                              | n.c.       |               |              |
| Other                                        | 2.21       | [0.16,30.43]  | 0.552        |
| Male physicians in practice longer           | Odds Ratio | 95% CI        | p value      |
| Age                                          | 0.93       | [0.87,0.99]   | <b>0.023</b> |
| Region                                       |            |               |              |
| Europe                                       | Base       |               |              |
| Africa                                       | n.c.       |               |              |
| Asia                                         | 2.85       | [0.24,34.22]  | 0.409        |
| North America                                | 0.22       | [0.01,3.44]   | 0.278        |
| Oceania                                      | n.c.       |               |              |
| South America                                | 4.23       | [0.18,101.52] | 0.374        |
| Multiple                                     | n.c.       |               |              |
| Residency training                           |            |               |              |
| Family Medicine                              | Base       |               |              |
| Orthopedics                                  | 0.27       | [0.02,3.23]   | 0.302        |
| Internal Medicine                            | n.c.       |               |              |
| PM&R                                         | 1.64       | [0.17,16.33]  | 0.671        |
| Pediatrics                                   | n.c.       |               |              |
| Emergency Medicine                           | n.c.       |               |              |
| Sports Medicine                              | n.c.       |               |              |
| Other                                        | 1.56       | [0.10,25.41]  | 0.754        |
| Male physicians in practice the same or less | Odds Ratio | 95% CI        | p value      |
| Age                                          | 0.95       | [0.89,1.02]   | 0.143        |
| Region                                       |            |               |              |
| Europe                                       | Base       |               |              |
| Africa                                       | n.c.       |               |              |
| Asia                                         | 1.91       | [0.13,29.01]  | 0.641        |
| North America                                | 0.04       | [0.00,0.73]   | <b>0.030</b> |
| Oceania                                      | n.c.       |               |              |
| South America                                | 7.5        | [0.32,174.90] | 0.210        |
| Multiple                                     | n.c.       |               |              |
| Residency training                           |            |               |              |
| Family Medicine                              | Base       |               |              |
| Orthopedics                                  | 0.09       | [0.01,0.83]   | <b>0.034</b> |
| Internal Medicine                            | n.c.       |               |              |
| PM&R                                         | 0.31       | [0.03,3.57]   | 0.347        |
| Pediatrics                                   | 2.81       | [0.13,61.32]  | 0.511        |

|                                                |            |               |              |
|------------------------------------------------|------------|---------------|--------------|
| Emergency Medicine                             | n.c.       |               |              |
| Sports Medicine                                | n.c.       |               |              |
| Other                                          | 0.28       | [0.02,4.96]   | 0.387        |
| Female physicians in practice longer           | Odds Ratio | 95% CI        | p value      |
| Age                                            | 0.95       | [0.90,1.01]   | 0.111        |
| Region                                         |            |               |              |
| Europe                                         | Base       |               |              |
| Africa                                         | 10.12      | [1.03,99.56]  | <b>0.047</b> |
| Asia                                           | 1.44       | [0.26,8.01]   | 0.678        |
| North America                                  | 1.31       | [0.17,9.96]   | 0.795        |
| Oceania                                        | n.c.       |               |              |
| South America                                  | 8.37       | [0.98,71.39]  | 0.052        |
| Multiple                                       | n.c.       |               |              |
| Residency training                             |            |               |              |
| Family Medicine                                | Base       |               |              |
| Orthopedics                                    | 1.84       | [0.24,14.37]  | 0.560        |
| Internal Medicine                              | n.c.       |               |              |
| PM&R                                           | 1.79       | [0.28,11.67]  | 0.541        |
| Pediatrics                                     | n.c.       |               |              |
| Emergency Medicine                             | n.c.       |               |              |
| Sports Medicine                                | n.c.       |               |              |
| Other                                          | 2.65       | [0.18,39.38]  | 0.480        |
| Female physicians in practice the same or less | Odds Ratio | 95% CI        | p value      |
| Age                                            | 0.97       | [0.92,1.01]   | 0.129        |
| Region                                         |            |               |              |
| Europe                                         | Base       |               |              |
| Africa                                         | 10.24      | [1.55,67.76]  | <b>0.016</b> |
| Asia                                           | 1.69       | [0.41,6.92]   | 0.468        |
| North America                                  | 0.43       | [0.06,3.16]   | 0.405        |
| Oceania                                        | n.c.       |               |              |
| South America                                  | 4.37       | [0.63,30.09]  | 0.134        |
| Multiple                                       | n.c.       |               |              |
| Residency training                             |            |               |              |
| Family Medicine                                | Base       |               |              |
| Orthopedics                                    | 2.06       | [0.30,14.13]  | 0.463        |
| Internal Medicine                              | 1.18       | [0.09,16.15]  | 0.899        |
| PM&R                                           | 2.56       | [0.38,17.15]  | 0.333        |
| Pediatrics                                     | 8.65       | [0.65,114.58] | 0.102        |
| Emergency Medicine                             | n.c.       |               |              |
| Sports Medicine                                | n.c.       |               |              |
| Other                                          | 1.86       | [0.13,26.77]  | 0.65         |
| Male athletic trainers                         | Odds Ratio | 95% CI        | p value      |
| Age                                            | 0.92       | [0.86,0.99]   | <b>0.019</b> |

| Region                        |            |                |              |
|-------------------------------|------------|----------------|--------------|
| Europe                        | Base       |                |              |
| Africa                        | 5.32       | [0.28,101.75]  | 0.267        |
| Asia                          | 17.81      | [1.44,220.33]  | <b>0.025</b> |
| North America                 | 0.31       | [0.02,5.51]    | 0.429        |
| Oceania                       | n.c.       |                |              |
| South America                 | 71.71      | [3.62,1419.55] | <b>0.005</b> |
| Multiple                      | n.c.       |                |              |
| Residency training            |            |                |              |
| Family Medicine               | Base       |                |              |
| Orthopedics                   | 0.10       | [0.01,0.99]    | <b>0.049</b> |
| Internal Medicine             | n.c.       |                |              |
| PM&R                          | 0.87       | [0.10,7.64]    | 0.903        |
| Pediatrics                    | 4.86       | [0.26,91.77]   | 0.292        |
| Emergency Medicine            | n.c.       |                |              |
| Sports Medicine               | n.c.       |                |              |
| Other                         | 0.50       | [0.03,8.89]    | 0.639        |
| Female athletic trainers      | Odds Ratio | 95% CI         | p value      |
| Age                           | 0.94       | [0.89,0.99]    | <b>0.022</b> |
| Region                        |            |                |              |
| Europe                        | Base       |                |              |
| Africa                        | 6.24       | [0.72,54.10]   | 0.097        |
| Asia                          | 5.61       | [0.87,36.21]   | 0.070        |
| North America                 | 0.53       | [0.08,3.49]    | 0.509        |
| Oceania                       | n.c.       |                |              |
| South America                 | 6.42       | [0.44,93.26]   | 0.173        |
| Multiple                      | 6.24       | [0.72,54.10]   | 0.097        |
| Residency training            |            |                |              |
| Family Medicine               | Base       |                |              |
| Orthopedics                   | 0.21       | [0.03,1.33]    | 0.096        |
| Internal Medicine             | 1.05       | [0.14,8.15]    | 0.961        |
| PM&R                          | 0.71       | [0.12,4.29]    | 0.707        |
| Pediatrics                    | 3.80       | [0.35,40.89]   | 0.270        |
| Emergency Medicine            | n.c.       |                |              |
| Sports Medicine               | n.c.       |                |              |
| Other                         | 0.56       | [0.04,7.40]    | 0.663        |
| Organizations/Administrations | Odds Ratio | 95% CI         | p value      |
| Age                           | 0.93       | [0.87,1.00]    | <b>0.038</b> |
| Region                        |            |                |              |
| Europe                        | Base       |                |              |
| Africa                        | 19.92      | [1.67,237.06]  | <b>0.018</b> |
| Asia                          | 11.27      | [1.01,126.05]  | <b>0.049</b> |
| North America                 | 0.31       | [0.02,5.79]    | 0.434        |
| Oceania                       | n.c.       |                |              |
| South America                 | 19.49      | [0.81,468.61]  | 0.067        |

|                    |      |               |       |
|--------------------|------|---------------|-------|
| Multiple           | n.c. |               |       |
| Residency training |      |               |       |
| Family Medicine    | Base |               |       |
| Orthopedics        | 0.18 | [0.02,1.70]   | 0.133 |
| Internal Medicine  | n.c. |               |       |
| PM&R               | 1.54 | [0.21,11.38]  | 0.670 |
| Pediatrics         | 9.50 | [0.54,165.95] | 0.123 |
| Emergency Medicine | n.c. |               |       |
| Sports Medicine    | n.c. |               |       |
| Other              | 0.80 | [0.05,13.73]  | 0.878 |

1

2

3

4

PM&R; physical medicine and rehabilitation, 95 % CI; 95 % confidence interval, n.c; not calculated
